# Supplementary material for: Calmodulin-like protein 3 is an estrogen receptor alpha coregulator for gene expression and drug response in a SNP, estrogen, and SERM-dependent fashion
Source: Springer Nature journal article supplement (doi:10.1186/s13058-017-0890-x), 2017-08-18

Mass spectrometry for Band 1

The band indicating binding between nuclear extract of ZNF423 WT LCLs treated with E2 and WT DNA probe in Figure 1B

| Protein matches                                  | scanf | Rank  | Sp | charge | Ions   | dCn    | dCn2   | XCorr                      | Reference | Redu       | Peptide |
|--------------------------------------------------|-------|-------|----|--------|--------|--------|--------|----------------------------|-----------|------------|---------|
| 993.253 0.00 CCT8 IPI:IPI00302925.4              | 1615  | 1/1   | 2  | 23/28  | 0.4274 | 0.4274 | 4.2806 | CCT8 IPI:IPI00302925.4     | 2         | K.AIADTGA  |         |
| 993.087 0.00 HSP90B1 IPI:IPI00027230.3           | 0751  | 1/110 | 2  | 10/14  | 0.1064 | 0.1064 | 2.0677 | CCT8 IPI:IPI00302925.4     | 2         | K.DWDDDDQ  |         |
| 883.806 0.00 HSP90AA1 IPI:IPI00382470.3          | 0569  | 1/1   | 2  | 14/18  | 0.2720 | 0.2720 | 2.3271 | CCT8 IPI:IPI00302925.4     | 1         | K.ETEGDVI  |         |
| 664.365 0.00 PDIA6 IPI:IPI00299571.5             | 1027  | 1/1   | 2  | 17/20  | 0.2810 | 0.2810 | 3.8979 | CCT8 IPI:IPI00302925.4     | 2         | K.GEENLM*  |         |
| 663.934 0.00 HSPA5 IPI:IPI00003362.2             | 2199  | 1/3   | 2  | 16/20  | 0.1089 | 0.1089 | 2.4781 | CCT8 IPI:IPI00302925.4     | 2         | K.LATNAA   |         |
| 663.312 0.00 VCP IPI:IPI00022774.3               | 2820  | 1/1   | 2  | 19/22  | 0.3041 | 0.3041 | 3.4342 | CCT8 IPI:IPI00302925.4     | 2         | K.LFVTNDA  |         |
| 553.243 0.00 EIF4A1 IPI:IPI00025491.1            | 2514  | 1/1   | 2  | 20/26  | 0.3881 | 0.3881 | 4.1630 | CCT8 IPI:IPI00302925.4     | 2         | K.NVGLDIE  |         |
| 443.592 0.00 DYNC112 IPI:IPI00216348.1           | 1450  | 1/1   | 2  | 16/18  | 0.3456 | 0.3456 | 3.2902 | CCT8 IPI:IPI00302925.4     | 1         | R.AVVDGVI  |         |
| 443.590 0.00 ANXA6 IPI:IPI00002459.4             | 2570  | 1/7   | 2  | 15/18  | 0.2050 | 0.2050 | 3.3397 | CCT8 IPI:IPI00302925.4     | 2         | R.DIDEVSSI |         |
| 334.605 0.00 MYH9 IPI:IPI00019502.3              | 0330  | 1/5   | 2  | 10/14  | 0.0857 | 0.0857 | 1.8928 | HSP90B1 IPI:IPI00027230.3  | 1         | K.AQAYQTQ  |         |
| 334.241 0.00 ACTN4 IPI:IPI00013808.1             | 2326  | 1/1   | 2  | 15/24  | 0.3505 | 0.3505 | 3.9053 | HSP90B1 IPI:IPI00027230.3  | -         | K.EEASDYL  |         |
| 333.617 0.00 MCM3 IPI:IPI00013214.2              | 0989  | 1/11  | 2  | 11/16  | 0.0790 | 0.0790 | 1.9420 | HSP90B1 IPI:IPI00027230.3  | 1         | K.ESTAEDK  |         |
| 333.585 0.00 HSP90AA2 IPI:IPI00031523.4          | 2234  | 1/1   | 2  | 22/26  | 0.4437 | 0.4437 | 4.7103 | HSP90B1 IPI:IPI00027230.3  | -         | K.GVVDSDI  |         |
| 333.353 0.00 ANXA2P2 IPI:IPI000334627.3          | 1551  | 1/1   | 2  | 15/16  | 0.1975 | 0.1975 | 2.7947 | HSP90B1 IPI:IPI00027230.3  | -         | K.SGTSEFL  |         |
| 333.194 0.00 ACTA2 IPI:IPI00008603.1             | 2703  | 1/9   | 2  | 14/20  | 0.1154 | 0.1154 | 2.7321 | HSP90B1 IPI:IPI00027230.3  | -         | K.SILFVPTS |         |
| 332.973 0.00 HNRNPK IPI:IPI00216049.1            | 1952  | 1/1   | 2  | 19/22  | 0.3501 | 0.3501 | 4.0420 | HSP90B1 IPI:IPI00027230.3  | 6         | R.ELISNASI |         |
| 332.846 0.00 CALML3 IPI:IPI00216984.5            | 2100  | 1/7   | 2  | 13/18  | 0.1572 | 0.1572 | 2.9496 | HSP90B1 IPI:IPI00027230.3  | -         | R.LSLNIDPI |         |
| 332.300 0.00 HTATSF1 IPI:IPI00013788.1           | 2009  | 1/2   | 2  | 14/16  | 0.2218 | 0.2218 | 2.8121 | HSP90B1 IPI:IPI00027230.3  | -         | R.SGYLLPD  |         |
| 224.025 0.00 COPB2 IPI:IPI00220219.6             | 1466  | 1/2   | 2  | 16/20  | 0.3187 | 0.3187 | 3.7371 | HSP90AA1 IPI:IPI00382470.3 | 2         | K.DQVANS/  |         |
| 223.806 0.00 ACTN1 IPI:IPI00013508.5             | 1206  | 1/1   | 2  | 15/18  | 0.3020 | 0.3020 | 3.3312 | HSP90AA1 IPI:IPI00382470.3 | 5         | K.EDQTEYL  |         |
| 223.597 0.00 CDC37 IPI:IPI00013122.1             | 1721  | 1/1   | 2  | 18/22  | 0.2541 | 0.2541 | 3.2268 | HSP90AA1 IPI:IPI00382470.3 | 6         | K.EGLELPEI |         |
| 223.526 0.00 HSP90AB1 IPI:IPI000411633.4         | 2295  | 1/1   | 3  | 37/132 | 0.4565 | 0.4565 | 6.9092 | HSP90AA1 IPI:IPI00382470.3 | 2         | K.LGLGIDEL |         |
| 223.477 0.00 LRPPRC IPI:IPI00783271.1            | 0550  | 1/1   | 2  | 14/20  | 0.2440 | 0.2440 | 2.8321 | HSP90AA1 IPI:IPI00382470.3 | 2         | R.DNSTM*C  |         |
| 223.402 0.00 ACTBL2 IPI:IPI00003269.1            | 2458  | 1/2   | 2  | 18/26  | 0.3153 | 0.3153 | 3.7699 | HSP90AA1 IPI:IPI00382470.3 | 7         | R.GVVDSEI  |         |
| 223.366 0.00 HSP90AB1 IPI:IPI000414676.6         | 2171  | 1/1   | 2  | 23/28  | 0.4230 | 0.4230 | 4.9528 | HSP90AA1 IPI:IPI00382470.3 | 2         | R.NPDDITNI |         |
| 223.191 0.00 ACTB IPI:IPI00021439.1              | 0282  | 1/4   | 2  | 12/16  | 0.1177 | 0.1177 | 1.6915 | HSP90AA1 IPI:IPI00382470.3 | 1         | R.TDTGEPV  |         |
| 223.161 0.00 IVL IPI:IPI00011692.2               | 2345  | 1/1   | 2  | 19/22  | 0.2701 | 0.2701 | 3.6792 | PDIA6 IPI:IPI00299571.5    | 1         | K.DVIELTDI |         |
| 222.948 0.00 SND1 IPI:IPI00140420.4              | 1019  | 1/1   | 2  | 15/20  | 0.3280 | 0.3280 | 3.0856 | PDIA6 IPI:IPI00299571.5    | 1         | K.GESPVDI  |         |
| 222.918 0.00 XRCC6 IPI:IPI00644712.4             | 2712  | 1/1   | 3  | 33/56  | 0.3480 | 0.3480 | 5.5163 | PDIA6 IPI:IPI00299571.5    | 1         | K.LAAVDA/  |         |
| 115.838 0.00 IPI:IPI00550731.2 IPI:IPI00550731.2 | 3066  | 1/1   | 3  | 30/96  | 0.2790 | 0.2790 | 5.2737 | PDIA6 IPI:IPI00299571.5    | 1         | R.DGELPVE  |         |
| 115.320 0.00 YWHAZ IPI:IPI00021263.3             | 2373  | 1/1   | 2  | 25/32  | 0.4917 | 0.4917 | 4.4088 | PDIA6 IPI:IPI00299571.5    | 1         | R.GSTAPVG  |         |
| 115.315 0.00 ANXA6 IPI:IPI00221226.7             | 3258  | 1/1   | 2  | 21/26  | 0.3114 | 0.3114 | 4.2278 | PDIA6 IPI:IPI00299571.5    | 1         | R.TGEAIVD  |         |
| 115.285 0.00 HNRNPH1 IPI:IPI00013881.6           | 2530  | 1/1   | 2  | 18/22  | 0.3176 | 0.3176 | 4.5907 | HSPA5 IPI:IPI00003362.2    | -         | K.ELEEVQI  |         |
| 115.220 0.00 ILF2 IPI:IPI00005198.2              | 0903  | 1/12  | 2  | 12/16  | 0.1049 | 0.1049 | 1.9677 | HSPA5 IPI:IPI00003362.2    | -         | K.ITITNDQI |         |
| 115.024 0.00 LDHA IPI:IPI00217966.8              | 2067  | 1/1   | 2  | 22/28  | 0.3510 | 0.3510 | 4.4687 | HSPA5 IPI:IPI00003362.2    | -         | K.NQLTSNP  |         |
| 114.941 0.00 BAT1 IPI:IPI00641829.5              | 2447  | 1/1   | 2  | 20/26  | 0.4046 | 0.4046 | 4.8312 | HSPA5 IPI:IPI00003362.2    | -         | K.SDIDEIVL |         |
| 114.869 0.00 YWHAQ IPI:IPI00018146.1             | 2105  | 1/1   | 2  | 27/32  | 0.4636 | 0.4636 | 5.4106 | HSPA5 IPI:IPI00003362.2    | -         | K.SQIFSTAS |         |
| 114.706 0.00 ANXA1 IPI:IPI00218918.5             | 1280  | 1/1   | 2  | 19/20  | 0.1929 | 0.1929 | 3.3366 | HSPA5 IPI:IPI00003362.2    | 15        | R.VEIIANDC |         |
| 114.527 0.00 ALDOC IPI:IPI00418262.5             | 2601  | 1/1   | 2  | 13/16  | 0.1267 | 0.1267 | 2.1621 | VCP IPI:IPI00022774.3      | -         | K.DVDLEFL  |         |
| 114.388 0.00 XRCC5 IPI:IPI00220834.8             | 2094  | 1/1   | 2  | 16/18  | 0.2698 | 0.2698 | 3.1480 | VCP IPI:IPI00022774.3      | -         | K.GDDLSTA  |         |
| 114.332 0.00 ENO1 IPI:IPI00465248.5              | 1116  | 1/3   | 2  | 13/18  | 0.1420 | 0.1420 | 2.3714 | VCP IPI:IPI00022774.3      | -         | K.LAGESES/ |         |
| 114.300 0.00 TPI1 IPI:IPI00383071.1              | 1992  | 1/1   | 2  | 18/22  | 0.2436 | 0.2436 | 3.1858 | VCP IPI:IPI00022774.3      | -         | R.EVDIGIPI |         |
| 114.276 0.00 TPM2 IPI:IPI00013991.1              | 0873  | 1/1   | 2  | 20/24  | 0.2484 | 0.2484 | 3.3129 | VCP IPI:IPI00022774.3      | -         | R.GGNIGDG  |         |
| 114.235 0.00 HNRNPF IPI:IPI00003881.5            | 2549  | 1/1   | 2  | 26/38  | 0.4573 | 0.4573 | 5.6904 | VCP IPI:IPI00022774.3      | -         | R.LIVDEAIN |         |
| 114.135 0.00 TUBB2C IPI:IPI00007752.1            | 1925  | 1/1   | 2  | 16/20  | 0.3201 | 0.3201 | 3.1032 | EIF4A1 IPI:IPI00025491.1   | 2         | K.ATQALVI  |         |
| 114.001 0.00 RPLP2 IPI:IPI00008529.1             | 2227  | 1/1   | 2  | 15/16  | 0.1569 | 0.1569 | 2.5072 | EIF4A1 IPI:IPI00025491.1   | 2         | K.EELTLEG  |         |
| 113.676 0.00 RPS17 IPI:IPI00221093.7             | 1744  | 1/1   | 2  | 23/26  | 0.4747 | 0.4747 | 5.0549 | EIF4A1 IPI:IPI00025491.1   | 9         | K.GYDVIAC  |         |
| 113.664 0.00 RPLP0 IPI:IPI00008530.1             | 1148  | 1/51  | 2  | 11/14  | 0.0586 | 0.0586 | 2.4043 | EIF4A1 IPI:IPI00025491.1   | 8         | R.ELAQQIQ  |         |
| 113.485 0.00 HNRNPA2B1 IPI:IPI00386854.6         | 2796  | 1/1   | 2  | 17/18  | 0.2642 | 0.2642 | 3.1431 | EIF4A1 IPI:IPI00025491.1   | 8         | R.VLITTDLI |         |
| 113.337 0.00 HSPA7 IPI:IPI00011134.2             | 1470  | 1/1   | 2  | 18/26  | 0.4064 | 0.4064 | 5.5396 | DYNC112 IPI:IPI00216348.1  | 17        | K.EAVAPVC  |         |
| 113.123 0.00 TGM1 IPI:IPI00014581.1              | 0901  | 1/1   | 2  | 25/40  | 0.5350 | 0.5350 | 5.1412 | DYNC112 IPI:IPI00216348.1  | 16        | K.SVSTPSE/ |         |
| 113.091 0.00 IGLC1 IPI:IPI00154742.6             | 0438  | 1/1   | 2  | 17/18  | 0.2392 | 0.2392 | 3.8373 | DYNC112 IPI:IPI00216348.1  | 6         | R.ADAEPEEA |         |
| 113.089 0.00 LMNA IPI:IPI00021405.3              | 1067  | 1/17  | 2  | 10/12  | 0.0617 | 0.0617 | 1.8488 | DYNC112 IPI:IPI00216348.1  | 12        | R.EIVTYTK  |         |
| 113.072 0.00 TUBA1C IPI:IPI00166768.3            | 1221  | 1/2   | 2  | 14/20  | 0.1453 | 0.1453 | 2.8479 | ANXA6 IPI:IPI00002459.4    | 1         | K.DAIGIGI  |         |
| 113.047 0.00 EIF5 IPI:IPI00022648.2              | 2872  | 1/1   | 2  | 17/20  | 0.2873 | 0.2873 | 3.6575 | ANXA6 IPI:IPI00002459.4    | 2         | R.DAFVAIV  |         |
| 112.964 0.00 TPM1 IPI:IPI00000230.6              | 3016  | 1/1   | 3  | 37/96  | 0.4054 | 0.4054 | 5.9086 | ANXA6 IPI:IPI00002459.4    | 1         | R.EEDDVVS  |         |
| 112.814 0.00 NPM1 IPI:IPI00220740.1              | 2677  | 1/2   | 2  | 14/16  | 0.2300 | 0.2300 | 1.9465 | ANXA6 IPI:IPI00002459.4    | 2         | R.SEIDLNI  |         |





Mass spectrometry for Band 3

The band indicating binding between nuclear extract of ZNF423 variant LCLs treated with E2+4-OH-TAM and variant DNA probe in Figure 1B

| Protein matches                                                    | scan#                | Rank | Sp       | charge | Ions                  | dCn                    | dCn2   | XCorr                  | Reference                                 | Redu | Peptide                      |
|--------------------------------------------------------------------|----------------------|------|----------|--------|-----------------------|------------------------|--------|------------------------|-------------------------------------------|------|------------------------------|
| 7 7 2.624 0.00 <a href="#">NCL IPI:IPI00183526.6</a>               | <a href="#">1710</a> | 1/1  | <u>2</u> |        | <a href="#">18/22</a> | <a href="#">0.3751</a> | 0.3751 | <a href="#">3.2889</a> | <a href="#">NCL IPI:IPI00183526.6</a>     | 4    | <a href="#">K.GLSEDTTE</a>   |
| 5 5 2.955 0.00 <a href="#">SFN IPI:IPI00013890.2</a>               | <a href="#">2853</a> | 1/1  | <u>3</u> |        | <a href="#">27/76</a> | <a href="#">0.2215</a> | 0.2215 | <a href="#">3.1886</a> | <a href="#">NCL IPI:IPI00183526.6</a>     | 4    | <a href="#">K.GLSEDTTE</a>   |
| 4 4 2.992 0.00 <a href="#">TXN IPI:IPI00216298.6</a>               | <a href="#">0920</a> | 1/3  | <u>2</u> |        | <a href="#">10/12</a> | <a href="#">0.1027</a> | 0.1027 | <a href="#">1.8357</a> | <a href="#">NCL IPI:IPI00183526.6</a>     | 4    | <a href="#">K.GQNQDYR</a>    |
| 4 4 2.859 0.00 <a href="#">NCL IPI:IPI00444262.3</a>               | <a href="#">1365</a> | 1/2  | <u>2</u> |        | <a href="#">13/16</a> | <a href="#">0.1527</a> | 0.1527 | <a href="#">2.5683</a> | <a href="#">NCL IPI:IPI00183526.6</a>     | 3    | <a href="#">K.NSTWSGEG</a>   |
| 3 3 4.144 0.00 <a href="#">CALML3 IPI:IPI00216984.5</a>            | <a href="#">1080</a> | 1/12 | <u>2</u> |        | <a href="#">11/14</a> | <a href="#">0.2257</a> | 0.2257 | <a href="#">2.1711</a> | <a href="#">NCL IPI:IPI00183526.6</a>     | 4    | <a href="#">K.QGTEIDGR</a>   |
| 3 3 3.772 0.00 <a href="#">PCNA IPI:IPI00021700.3</a>              | <a href="#">2184</a> | 1/37 | <u>2</u> |        | <a href="#">10/12</a> | <a href="#">0.0860</a> | 0.0860 | <a href="#">2.2779</a> | <a href="#">NCL IPI:IPI00183526.6</a>     | 4    | <a href="#">R.LELQGR(C</a>   |
| 3 3 3.420 0.00 <a href="#">YWHAG IPI:IPI00220642.7</a>             | <a href="#">2410</a> | 1/1  | <u>2</u> |        | <a href="#">15/18</a> | <a href="#">0.2396</a> | 0.2396 | <a href="#">3.0367</a> | <a href="#">NCL IPI:IPI00183526.6</a>     | 4    | <a href="#">R.SISLYYTG(I</a> |
| 3 3 3.073 0.00 <a href="#">YWHAE IPI:IPI00000816.1</a>             | <a href="#">0504</a> | 1/23 | <u>2</u> |        | <a href="#">11/14</a> | <a href="#">0.2100</a> | 0.2100 | <a href="#">1.8957</a> | <a href="#">SFN IPI:IPI00013890.2</a>     | -    | <a href="#">K.EAGDAESF</a>   |
| 3 3 2.986 0.00 <a href="#">GAPDH IPI:IPI00219018.7</a>             | <a href="#">2167</a> | 1/19 | <u>3</u> |        | <a href="#">21/52</a> | <a href="#">0.2531</a> | 0.2531 | <a href="#">3.4835</a> | <a href="#">SFN IPI:IPI00013890.2</a>     | 1    | <a href="#">K.SNEEGSEE</a>   |
| 3 3 2.927 0.00 <a href="#">ANXA2P2 IPI:IPI00334627.3</a>           | <a href="#">2343</a> | 1/1  | <u>3</u> |        | <a href="#">28/92</a> | <a href="#">0.1157</a> | 0.1157 | <a href="#">3.9363</a> | <a href="#">SFN IPI:IPI00013890.2</a>     | 1    | <a href="#">R.DNLT(LWT</a>   |
| 2 2 3.795 0.00 <a href="#">ATP5B IPI:IPI00303476.1</a>             | <a href="#">1765</a> | 1/2  | <u>2</u> |        | <a href="#">12/14</a> | <a href="#">0.0574</a> | 0.0574 | <a href="#">2.5416</a> | <a href="#">SFN IPI:IPI00013890.2</a>     | 1    | <a href="#">R.VLSSIEQK</a>   |
| 2 2 3.374 0.00 <a href="#">TUBA1C IPI:IPI00166768.3</a>            | <a href="#">2135</a> | 1/1  | <u>2</u> |        | <a href="#">18/20</a> | <a href="#">0.2283</a> | 0.2283 | <a href="#">2.9159</a> | <a href="#">SFN IPI:IPI00013890.2</a>     | 1    | <a href="#">R.YLAEVAT(C</a>  |
| 2 2 2.818 0.00 <a href="#">ACTA2 IPI:IPI00008603.1</a>             | <a href="#">3093</a> | 1/2  | <u>2</u> |        | <a href="#">16/20</a> | <a href="#">0.2067</a> | 0.2067 | <a href="#">3.2255</a> | <a href="#">TXN IPI:IPI00216298.6</a>     | 1    | <a href="#">K.LEATIN(I</a>   |
| 2 2 2.355 0.00 <a href="#">TCEB2 IPI:IPI00026670.3</a>             | <a href="#">2582</a> | 1/14 | <u>2</u> |        | <a href="#">12/16</a> | <a href="#">0.1192</a> | 0.1192 | <a href="#">2.3216</a> | <a href="#">TXN IPI:IPI00216298.6</a>     | 1    | <a href="#">K.LEATINEL</a>   |
| 1 1 5.804 0.00 <a href="#">MYH9 IPI:IPI00019502.3</a>              | <a href="#">2725</a> | 1/1  | <u>2</u> |        | <a href="#">20/24</a> | <a href="#">0.3089</a> | 0.3089 | <a href="#">3.9014</a> | <a href="#">TXN IPI:IPI00216298.6</a>     | 1    | <a href="#">K.TAFOEALI</a>   |
| 1 1 5.345 0.00 <a href="#">YWHAZ IPI:IPI00021263.3</a>             | <a href="#">1916</a> | 1/2  | <u>2</u> |        | <a href="#">12/16</a> | <a href="#">0.3591</a> | 0.3591 | <a href="#">2.5202</a> | <a href="#">TXN IPI:IPI00216298.6</a>     | 1    | <a href="#">K.VGEFSGAN</a>   |
| 1 1 5.139 0.00 <a href="#">ACTBL2 IPI:IPI00003269.1</a>            | <a href="#">2405</a> | 1/13 | <u>2</u> |        | <a href="#">14/18</a> | <a href="#">0.1987</a> | 0.1987 | <a href="#">3.0824</a> | <a href="#">NCL IPI:IPI00444262.3</a>     | 3    | <a href="#">K.EVFEDAAI</a>   |
| 1 1 5.006 0.00 <a href="#">ANXA2 IPI:IPI00418169.3</a>             | <a href="#">2281</a> | 1/1  | <u>2</u> |        | <a href="#">15/16</a> | <a href="#">0.3755</a> | 0.3755 | <a href="#">3.4358</a> | <a href="#">NCL IPI:IPI00444262.3</a>     | 2    | <a href="#">K.NDLAVVD</a>    |
| 1 1 4.900 0.00 <a href="#">SSBP1 IPI:IPI00029744.1</a>             | <a href="#">2552</a> | 1/1  | <u>2</u> |        | <a href="#">15/16</a> | <a href="#">0.2995</a> | 0.2995 | <a href="#">2.9782</a> | <a href="#">NCL IPI:IPI00444262.3</a>     | 2    | <a href="#">K.TGISDVFA</a>   |
| 1 1 4.275 0.00 <a href="#">NACA IPI:IPI00023748.3</a>              | <a href="#">1086</a> | 1/90 | <u>2</u> |        | <a href="#">9/12</a>  | <a href="#">0.0511</a> | 0.0511 | <a href="#">1.9396</a> | <a href="#">NCL IPI:IPI00444262.3</a>     | 3    | <a href="#">K.VTQDELK</a>    |
| 1 1 4.091 0.00 <a href="#">CALML5 IPI:IPI00021536.2</a>            | <a href="#">2400</a> | 1/1  | <u>2</u> |        | <a href="#">15/20</a> | <a href="#">0.1353</a> | 0.1353 | <a href="#">3.0156</a> | <a href="#">CALML3 IPI:IPI00216984.5</a>  | -    | <a href="#">K.LSDEEVDF</a>   |
| 1 1 3.902 0.00 <a href="#">HNRNPAB IPI:IPI00334587.1</a>           | <a href="#">2309</a> | 1/1  | <u>2</u> |        | <a href="#">24/32</a> | <a href="#">0.4545</a> | 0.4545 | <a href="#">5.7947</a> | <a href="#">CALML3 IPI:IPI00216984.5</a>  | -    | <a href="#">R.AADTDGD</a>    |
| 1 1 3.773 0.00 <a href="#">HSPB1 IPI:IPI00025512.2</a>             | <a href="#">2213</a> | 1/1  | <u>2</u> |        | <a href="#">17/22</a> | <a href="#">0.3187</a> | 0.3187 | <a href="#">3.6209</a> | <a href="#">CALML3 IPI:IPI00216984.5</a>  | -    | <a href="#">R.SLGQNPT</a>    |
| 1 1 3.755 0.00 <a href="#">EIF6 IPI:IPI00010105.1</a>              | <a href="#">2172</a> | 1/1  | <u>2</u> |        | <a href="#">21/24</a> | <a href="#">0.3687</a> | 0.3687 | <a href="#">3.9321</a> | <a href="#">PCNA IPI:IPI00021700.3</a>    | -    | <a href="#">K.FSASGELG</a>   |
| 1 1 3.716 0.00 <a href="#">HMGB3L1 IPI:IPI00006437.2</a>           | <a href="#">0821</a> | 1/7  | <u>2</u> |        | <a href="#">10/12</a> | <a href="#">0.1725</a> | 0.1725 | <a href="#">1.9883</a> | <a href="#">PCNA IPI:IPI00021700.3</a>    | -    | <a href="#">K.VSDYEM*F</a>   |
| 1 1 3.402 0.00 <a href="#">HSP90AA1 IPI:IPI00382470.3</a>          | <a href="#">2841</a> | 1/1  | <u>2</u> |        | <a href="#">23/36</a> | <a href="#">0.4484</a> | 0.4484 | <a href="#">5.3956</a> | <a href="#">PCNA IPI:IPI00021700.3</a>    | -    | <a href="#">R.AEDNADTI</a>   |
| 1 1 3.252 0.00 <a href="#">HIST1H4J IPI:IPI00453473.6</a>          | <a href="#">2089</a> | 1/1  | <u>2</u> |        | <a href="#">22/26</a> | <a href="#">0.3623</a> | 0.3623 | <a href="#">4.6718</a> | <a href="#">YWHAG IPI:IPI00220642.7</a>   | 1    | <a href="#">K.NVTELNEF</a>   |
| 1 1 3.241 0.00 <a href="#">LMNA IPI:IPI00021405.3</a>              | <a href="#">0842</a> | 1/2  | <u>2</u> |        | <a href="#">15/16</a> | <a href="#">0.2387</a> | 0.2387 | <a href="#">2.6324</a> | <a href="#">YWHAG IPI:IPI00220642.7</a>   | 1    | <a href="#">R.ATVVE SSE</a>  |
| 1 1 3.188 0.00 <a href="#">TUBB IPI:IPI00011654.2</a>              | <a href="#">2280</a> | 1/1  | <u>2</u> |        | <a href="#">16/18</a> | <a href="#">0.3189</a> | 0.3189 | <a href="#">2.9567</a> | <a href="#">YWHAG IPI:IPI00220642.7</a>   | -    | <a href="#">R.YLAEVAT(C</a>  |
| 1 1 3.100 0.00 <a href="#">A2ML1 IPI:IPI00419215.5</a>             | <a href="#">1968</a> | 1/1  | <u>2</u> |        | <a href="#">16/20</a> | <a href="#">0.2896</a> | 0.2896 | <a href="#">3.1061</a> | <a href="#">YWHAE IPI:IPI00000816.1</a>   | 1    | <a href="#">K.EAAENSLA</a>   |
| 1 1 3.066 0.00 <a href="#">IPI:IPI00383732.1 IPI:IPI00383732.1</a> | <a href="#">1274</a> | 1/1  | <u>2</u> |        | <a href="#">17/20</a> | <a href="#">0.2998</a> | 0.2998 | <a href="#">3.8137</a> | <a href="#">YWHAE IPI:IPI00000816.1</a>   | -    | <a href="#">K.EALQDVEI</a>   |
| 1 1 3.028 0.00 <a href="#">TUBB2C IPI:IPI00007752.1</a>            | <a href="#">1034</a> | 1/2  | <u>2</u> |        | <a href="#">11/12</a> | <a href="#">0.0809</a> | 0.0809 | <a href="#">2.2988</a> | <a href="#">YWHAE IPI:IPI00000816.1</a>   | 19   | <a href="#">K.LAEQAER</a>    |
| 1 1 3.020 0.00 <a href="#">HSPA8 IPI:IPI00003865.1</a>             | <a href="#">2418</a> | 1/1  | <u>2</u> |        | <a href="#">12/14</a> | <a href="#">0.1157</a> | 0.1157 | <a href="#">2.5300</a> | <a href="#">GAPDH IPI:IPI00219018.7</a>   | 3    | <a href="#">K.VGVNGFG</a>    |
| 1 1 2.944 0.00 <a href="#">EEF1A2 IPI:IPI00014424.1</a>            | <a href="#">2671</a> | 1/25 | <u>2</u> |        | <a href="#">16/28</a> | <a href="#">0.2474</a> | 0.2474 | <a href="#">3.1951</a> | <a href="#">GAPDH IPI:IPI00219018.7</a>   | 5    | <a href="#">R.GALQNIIP/</a>  |
| 1 1 2.873 0.00 <a href="#">ACTB IPI:IPI00021439.1</a>              | <a href="#">2964</a> | 1/1  | <u>3</u> |        | <a href="#">25/72</a> | <a href="#">0.3281</a> | 0.3281 | <a href="#">3.2320</a> | <a href="#">GAPDH IPI:IPI00219018.7</a>   | 5    | <a href="#">R.GALQNIIP/</a>  |
| 1 1 2.855 0.00 <a href="#">P4HB IPI:IPI00010796.1</a>              | <a href="#">1918</a> | 1/1  | <u>2</u> |        | <a href="#">15/16</a> | <a href="#">0.3310</a> | 0.3310 | <a href="#">2.4304</a> | <a href="#">ANXA2P2 IPI:IPI00334627.3</a> | 5    | <a href="#">K.AYTNFDAI</a>   |
| 1 1 2.814 0.00 <a href="#">IGLC1 IPI:IPI00154742.6</a>             | <a href="#">2451</a> | 1/7  | <u>2</u> |        | <a href="#">14/18</a> | <a href="#">0.1372</a> | 0.1372 | <a href="#">2.9165</a> | <a href="#">ANXA2P2 IPI:IPI00334627.3</a> | 5    | <a href="#">R.DALNIETA</a>   |

Venn diagram for proteins identified by mass spectrometry

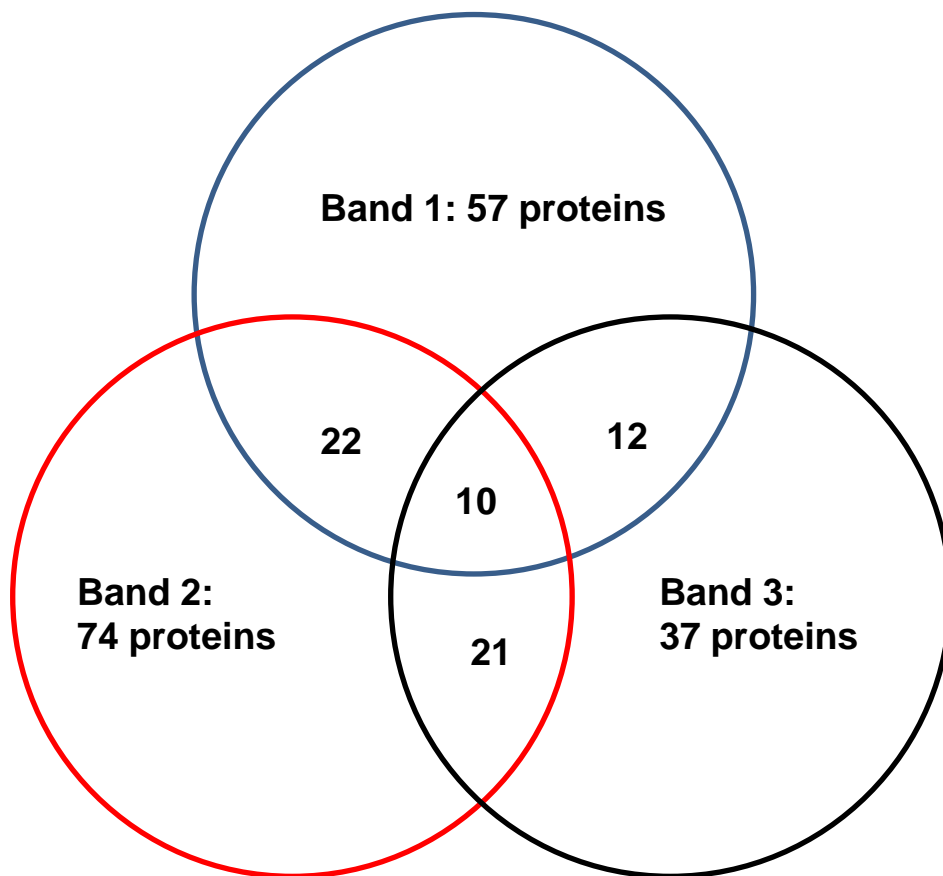

Supplement: MOESM1 [file 14225208]
