# Supplementary material for: Calmodulin-like protein 3 is an estrogen receptor alpha coregulator for gene expression and drug response in a SNP, estrogen, and SERM-dependent fashion
Source: Springer Nature journal article supplement (doi:10.1186/s13058-017-0890-x), 2017-08-18
Supplement: MOESM2 [file 14225208]

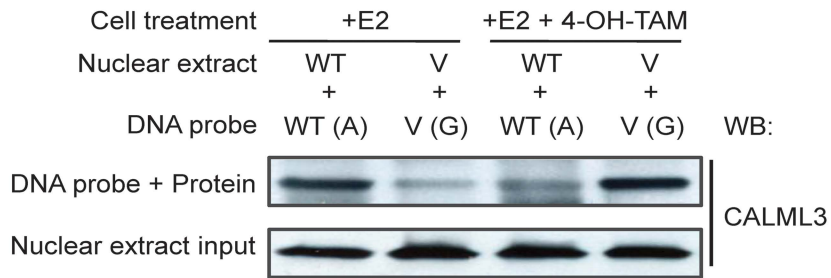

**Figure S1**

Detection of the candidate protein CALML3 after EMSA assay. DNA probes containing either WT or variant *ZNF423* rs9940645 SNP sequences were incubated with nuclear protein extract from LCLs carrying WT or variant SNP genotypes that had been treated with E2 ± 4-OH-TAM. CALML3 protein was detected with the specific CALML3 antibody using the EMSA membrane.

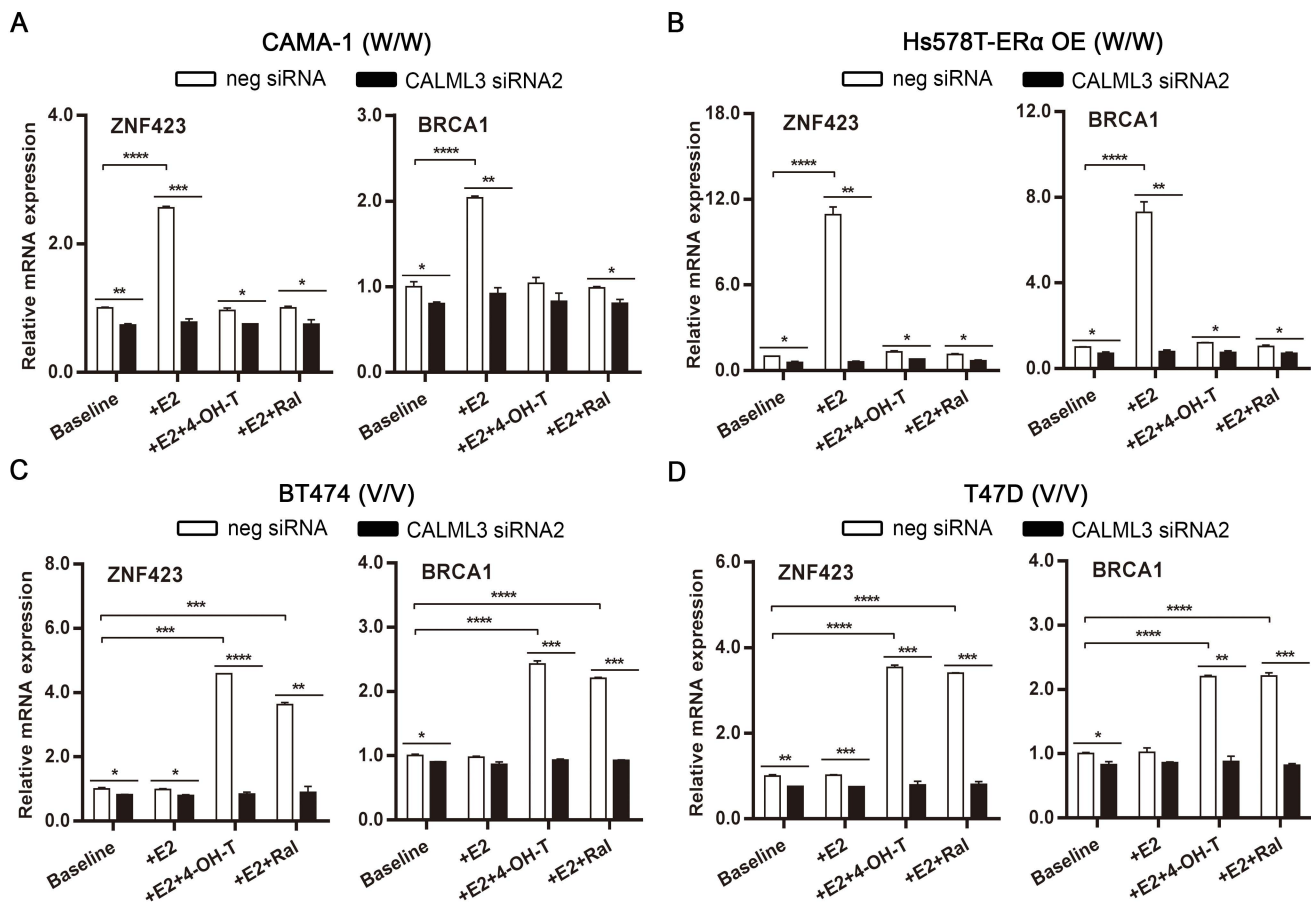

**Figure S2**

The expression of ZNF423 and BRCA1 determined by qRT-PCR in a panel of breast cancer cells after knocking down CALML3 using a second siRNA. The ZNF423 and BRCA1 mRNA expression levels relative to actin are shown as means of three independent experiments ( $\pm$  SEM), and comparisons were performed using a two-tailed Student's *t*-test, \* $p < 0.05$ , \*\* $p < 0.01$ , \*\*\* $p < 0.001$ , \*\*\*\* $p < 0.0001$ .

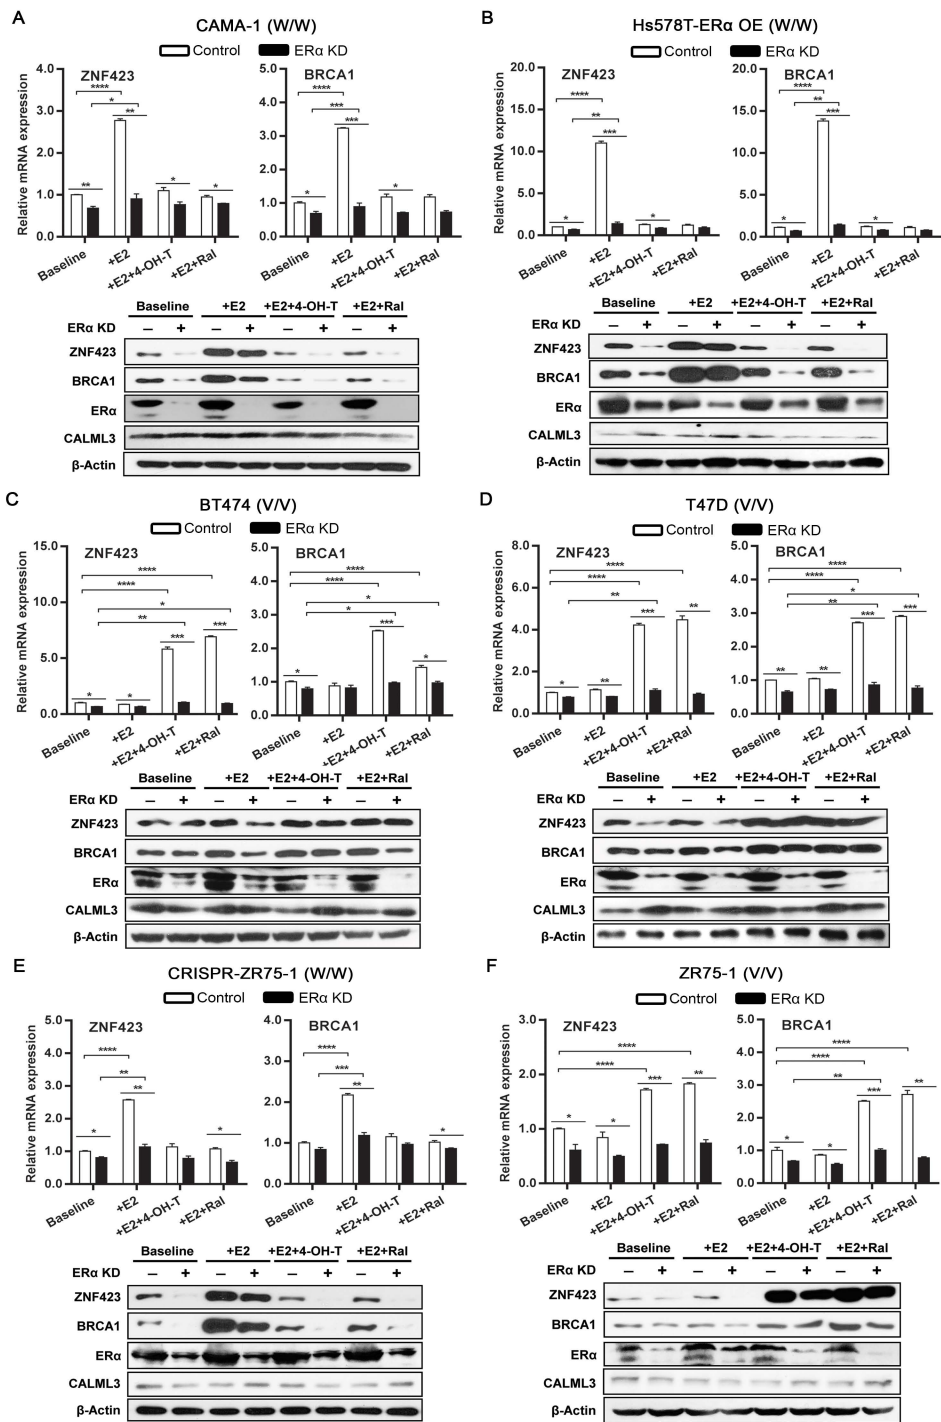

**Figure S3**

The expression of ZNF423 and BRCA1 determined by qRT-PCR in a panel of breast cancer cells including CRISPR-ZR75-1 cells (WT) and ZR75-1 cells (Variant) after knocking down ER $\alpha$ . Relative expression levels are shown as means of three independent experiments ( $\pm$  SEM), and comparison were made using a two-tailed Student's t-test, \* $p < 0.05$ , \*\* $p < 0.01$ , \*\*\* $p < 0.001$ , \*\*\*\* $p < 0.0001$ . Protein levels were determined by Western Blot.

A

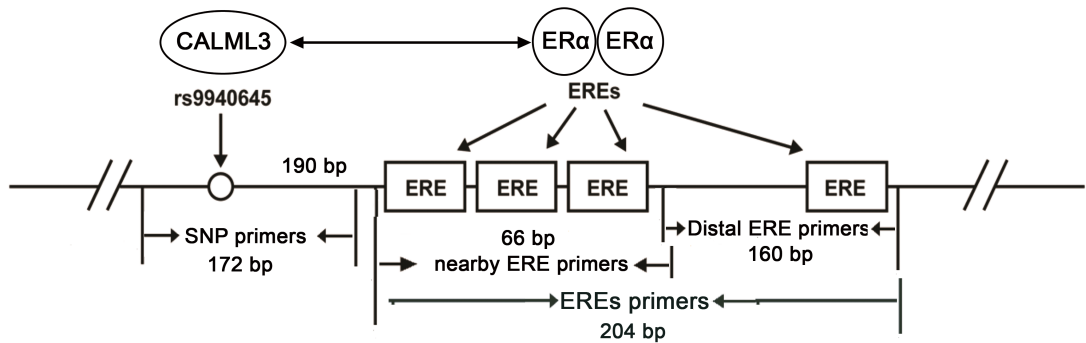

B

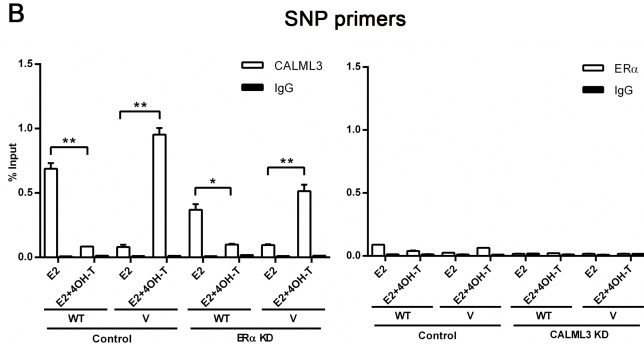

C

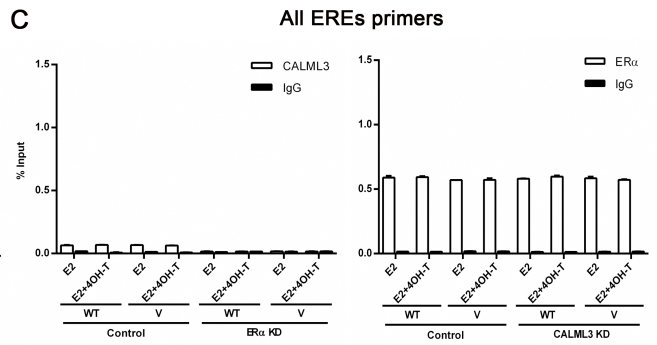

D

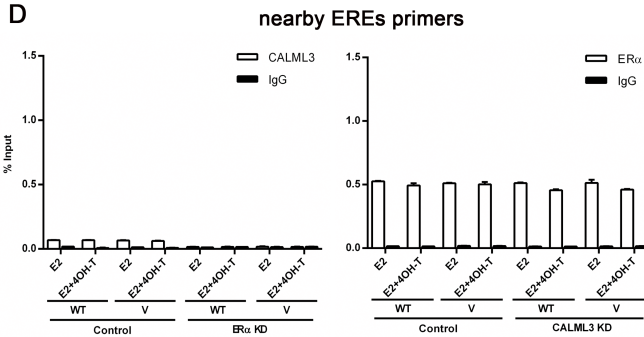

E

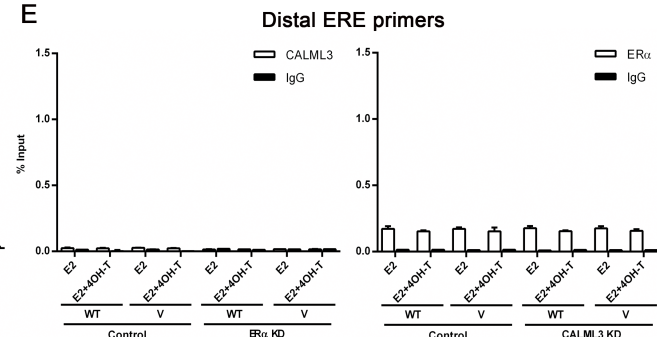

### Figure S4

SNP-dependent regulation of CALML3 and ERα. CHIP-qPCR assays using CALML3 antibody after knocking down ERα, or using ERα antibody after knocking down CALML3 in CRISPR-ZR75-1 cells (WT) and ZR75-1 cells (Variant) treated with E2 ± 4-OH-TAM/raloxifen. (A) The locations of primers used to perform the CHIP-qPCR are shown. (B) Amplicons amplified the region containing only the SNP. (C) Amplicons amplified the region containing all the EREs. (D) Amplicons amplified the region containing nearby EREs. (E) Amplicons amplified the region containing only the distal ERE. The enrichment of DNA fragments (three independent experiments, mean ± SEM) between different treatments were compared using two-tailed Student's t-test, \* $p < 0.05$ , \*\* $p < 0.01$ , \*\*\* $p < 0.001$ .



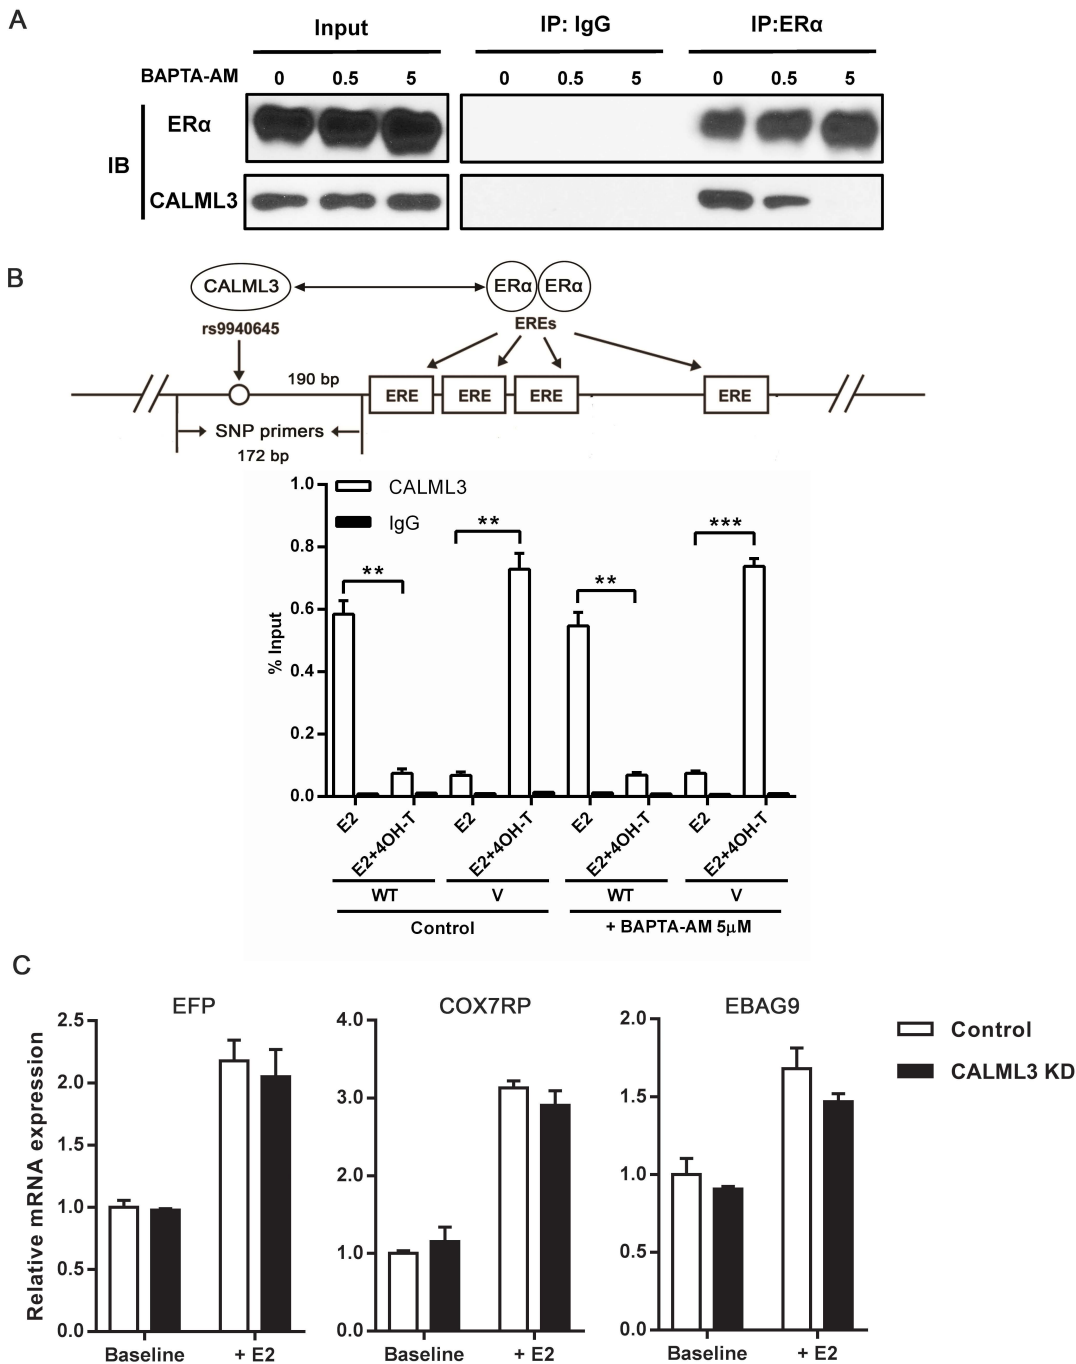

**Figure S5**

CALML3 binding to the ZNF423 SNP is calcium dependent but its interaction with ER is calcium independent. **(A)** CALML3-ER binding decreased significantly after calcium level was reduced with calcium chelator, BAPTA-AM at the concentration of 0.5 and 5  $\mu$ M. **(B)** The binding between CALML3 and ZNF423 SNP was independent on calcium. **(C)** Expression of canonical ER targeted genes did not change after down regulating CALML3 in the presence of E2 treatment.

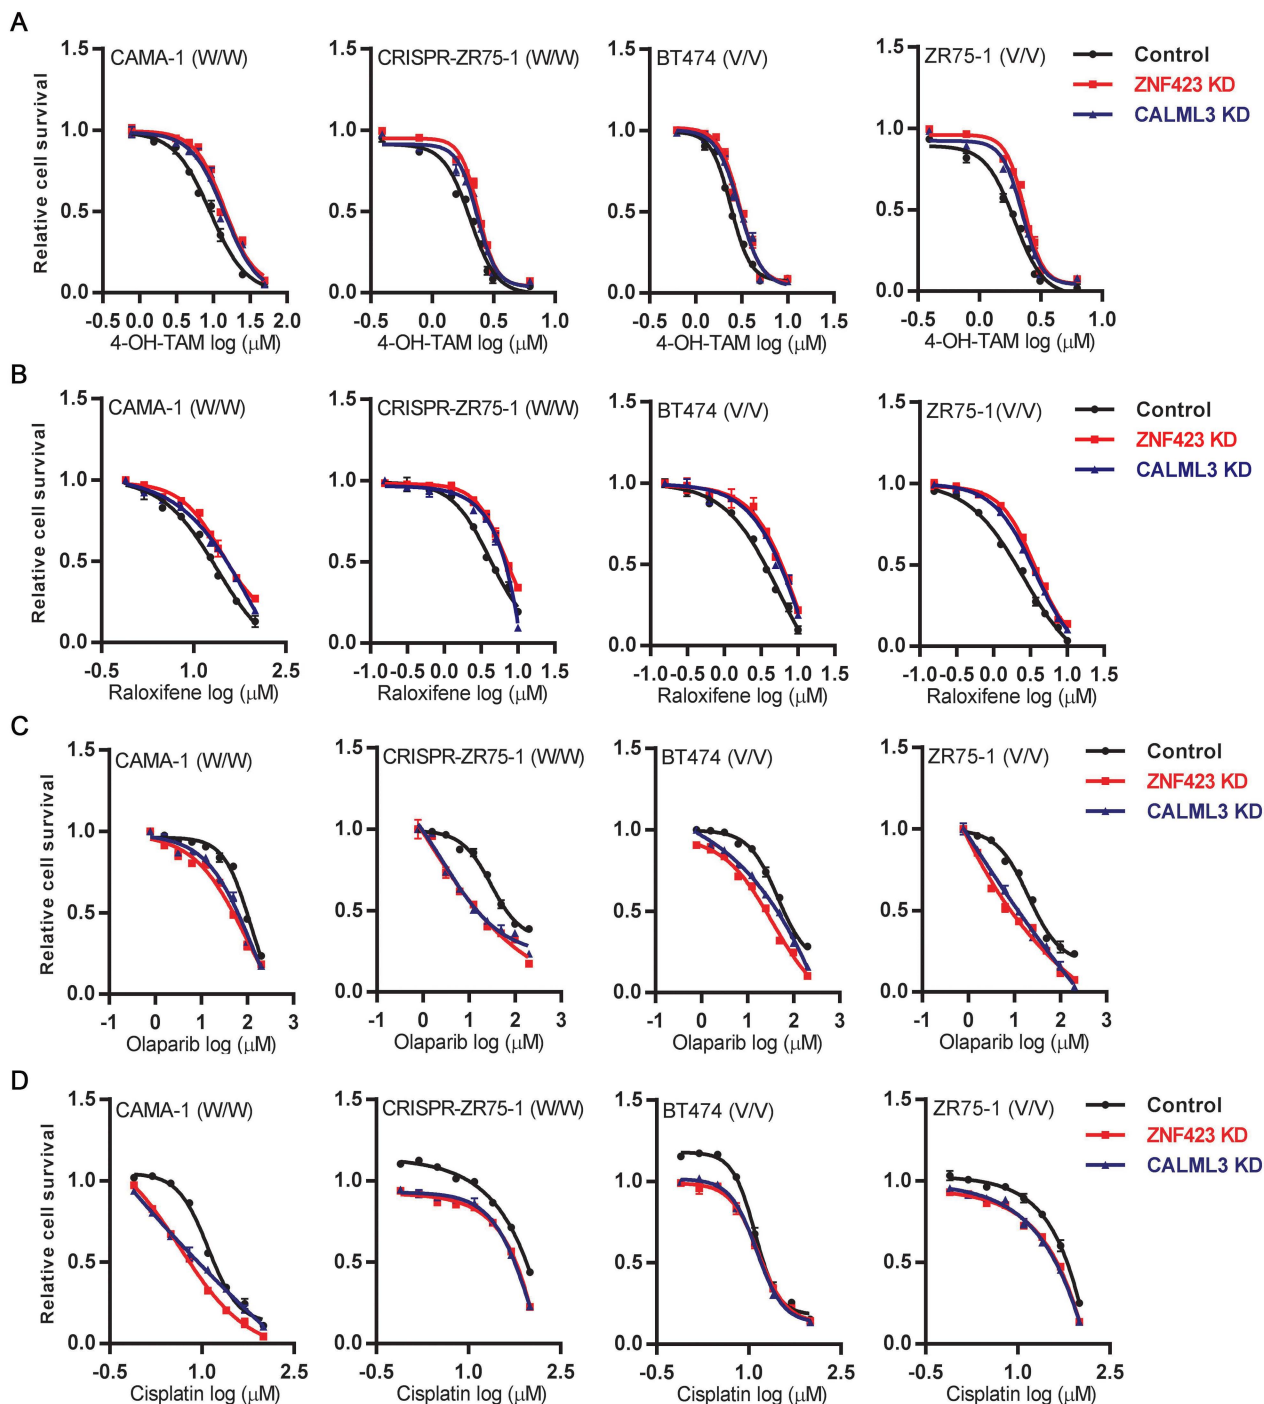

**Figure S6**

Drug cytotoxicity assays performed with a panel of breast cancer cells after the down regulation of ZNF423 or CALML3. Two representative breast cancer cell lines with the same *ZNF423* SNP genotype were selected and treated with a series of drug concentrations together with 0.01 nM E2 for 3 days, and cell viability was determined by MTS assay. **(A)** 4-OH-TAM. **(B)** Raloxifene. **(C)** Olaparib. **(D)** Cisplatin.

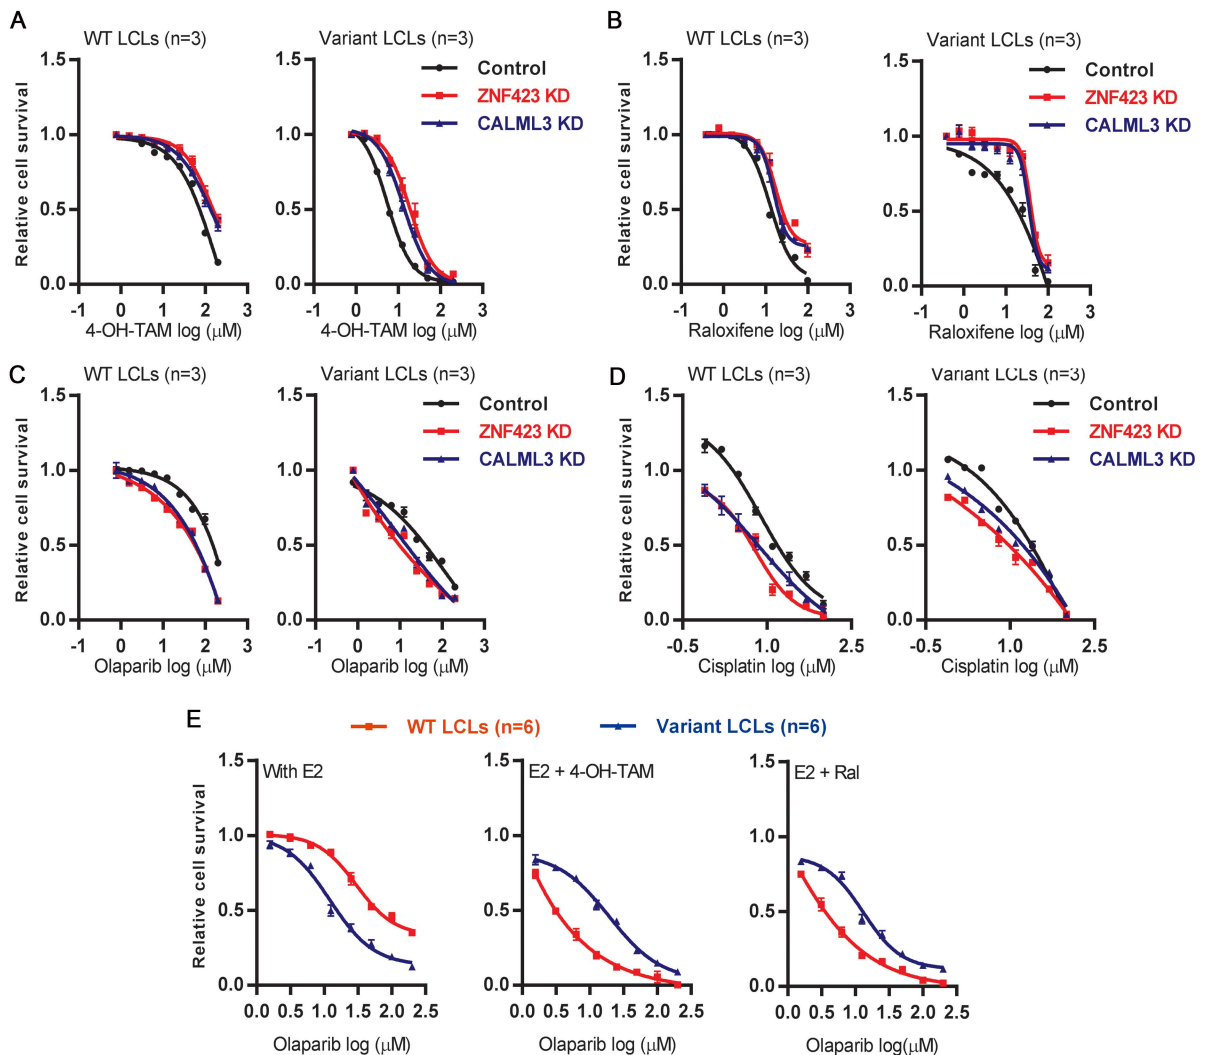

**Figure S7**

Drug cytotoxicity assays performed with a panel of LCLs with WT or variant *ZNF423* SNP genotypes treated with 4-OH-TAM, raloxifene, olaparib, and cisplatin after the down regulation of *ZNF423* or *CALML3*, or treated with olaparib alone or in combination with 4-OH-TAM or raloxifene. The drug treatments were in the presence of 0.01 nM E2 and the viability of cells after treatments for 3 days were determined by MTS assay. **(A)** 4-OH-TAM. **(B)** Raloxifene. **(C)** Olaparib. **(D)** Cisplatin. **(E)** Olaparib  $\pm$  4-OH-TAM/raloxifene.

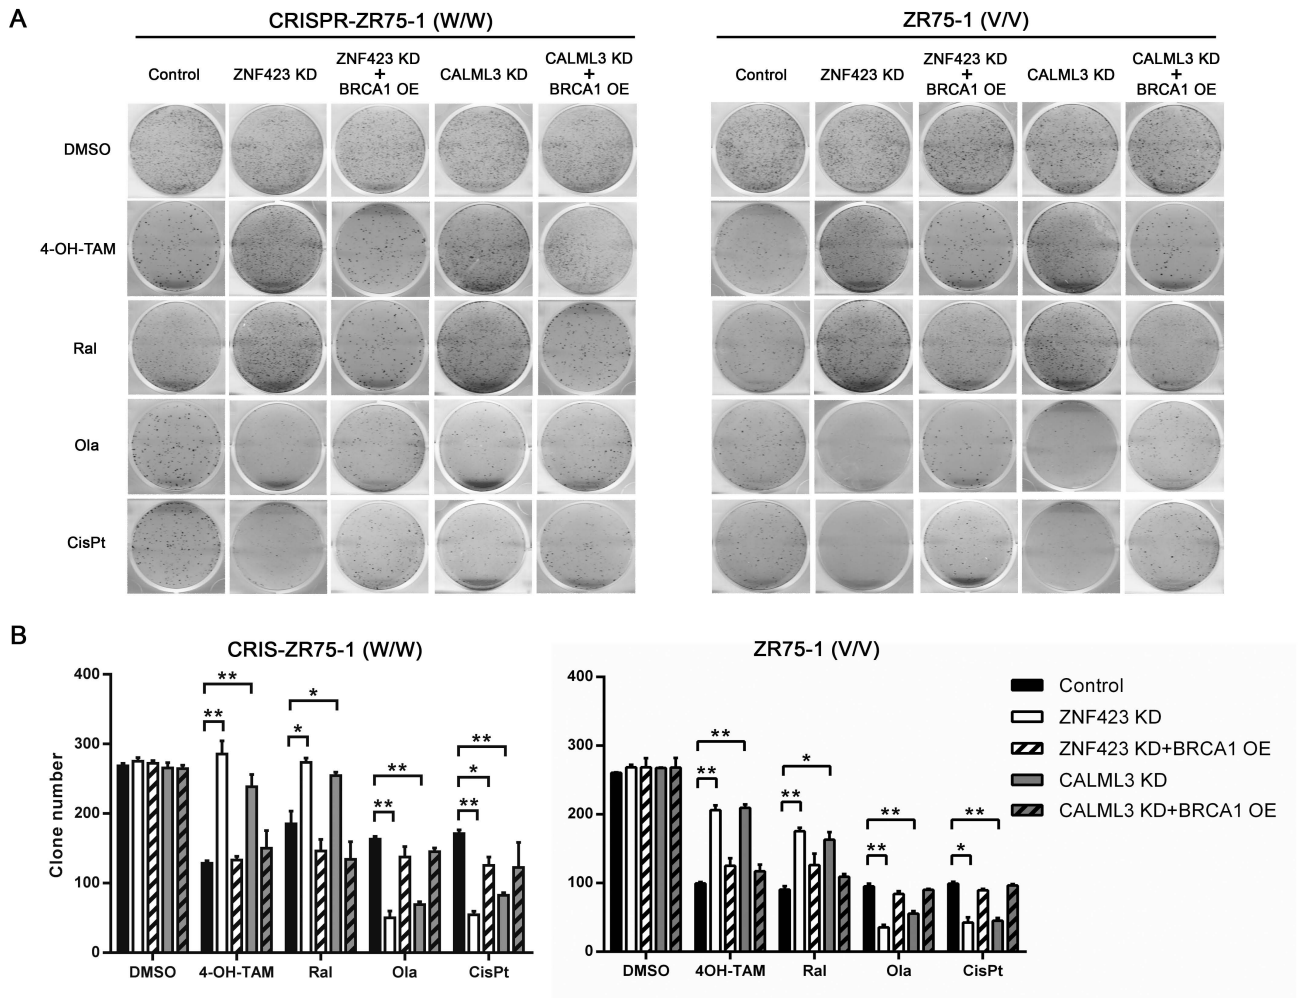

**Figure S8**

Colony formation in ZR75-1 cells with different ZNF423 SNP genotypes with drug treatments. **(A)** Representative clones are shown for ZR75-1 and CRISPR-ZR75-1 cells treated with the indicated drugs for 4 weeks. **(B)** Clone number was counted in each well, shown here as three independent experiments, Mean  $\pm$  SEM. Comparisons with the control in each treatment were performed by two-tailed Student's t-test, \* $p$  < 0.05, \*\* $p$  < 0.01.
